# Supplementary material
Source: publisher figshare collection journal article supplement (https://tandf.figshare.com/ndownloader/files/17661566)
Supplement: Supplementary file 1 [file 17661566]

Supplementary table S1. The “Detailed” method. Change from baseline in Nvoxel, IRE and ME

|                             | CZP |                    | PBO+CZP |                    |
|-----------------------------|-----|--------------------|---------|--------------------|
|                             | n   | Median (Range)     | n       | Median (Range)     |
| Nvoxel                      |     |                    |         |                    |
| PIP2-4                      |     |                    |         |                    |
| Week 1                      | 6   | 0 (-144–511)       | 3       | -35 (-393– -32)    |
| Week 2                      | 7   | 12 (-170–145)      | 5       | -56 (-609–262)     |
| Week 4                      | 4   | -75 (-446–0)       | 5       | -80 (-617–113)     |
| Week 8                      | 10  | 10 (-370–396)      | 7       | -69 (-884–15)      |
| Week 16                     | 8   | -12 (-765–103)     | 5       | -32 (-760–26)      |
| MCP2-4                      |     |                    |         |                    |
| Week 1                      | 4   | -503 (-1470–77)    | 1       | 14*                |
| Week 2                      | 5   | 0 (-1079–596)      | 2       | 62 (-63–186)       |
| Week 4                      | 5   | 0 (-1045–87)       | 1       | 0*                 |
| Week 8                      | 4   | 53 (0–890)         | 2       | 90 (-20–199)       |
| Week 16                     | 5   | -473 (-1682–66)    | 1       | 0*                 |
| Initial Rate of Enhancement |     |                    |         |                    |
| PIP2-4                      |     |                    |         |                    |
| Week 1                      | 3   | -0.00 (-0.01–0.00) | 2       | 0.00 (-0.01–0.00)  |
| Week 2                      | 5   | 0.00 (-0.5–0.2)    | 5       | 0.00 (-0.03–0.00)  |
| Week 4                      | 3   | 0.00 (0.00–0.01)   | 5       | 0.00 (-0.04–0.11)  |
| Week 8                      | 5   | 0.00 (-0.53–0.02)  | 5       | 0.01 (0.00–0.21)   |
| Week 16                     | 2   | 0.02 (0.00–0.04)   | 4       | 0.00 (0.00–0.00)   |
| MCP2-4                      |     |                    |         |                    |
| Week 1                      | 3   | -0.00 (-0.01–0.01) | 0       | -                  |
| Week 2                      | 2   | -0.00 (0.00–0.00)  | 2       | 0.01 (0.00–0.01)   |
| Week 4                      | 4   | 0.00 (-0.04–0.00)  | 0       | -                  |
| Week 8                      | 2   | -0.02 (-0.05–0.00) | 2       | 0.27 (0.00–0.55)   |
| Week 16                     | 5   | 0.00 (-0.04–0.02)  | 0       | –                  |
| Maximum Enhancement         |     |                    |         |                    |
| PIP2-4                      |     |                    |         |                    |
| Week 1                      | 3   | -0.30 (-0.51–0.06) | 2       | -0.16 (-1.00–0.13) |
| Week 2                      | 5   | 0.02 (-0.31–0.18)  | 5       | -0.17 (-0.73–0.51) |
| Week 4                      | 3   | 0.03 (-0.54–0.05)  | 5       | -0.26 (-0.35–0.08) |
| Week 8                      | 5   | -0.01 (-0.60–0.36) | 5       | -0.02 (-0.49–0.60) |
| Week 16                     | 2   | -0.12 (-0.61–0.37) | 4       | -0.19 (-0.60–0.02) |
| MCP2-4                      |     |                    |         |                    |
| Week 1                      | 3   | -0.34 (-0.40–0.03) | 0       | -                  |
| Week 2                      | 2   | -0.01 (-0.35–0.34) | 2       | 0.37 (0.12–0.63)   |
| Week 4                      | 4   | 0.13 (0.11–0.53)   | 0       | -                  |
| Week 8                      | 2   | -0.36 (-0.16–0.08) | 2       | 0.06 (-0.26–0.37)  |
| Week 16                     | 5   | -0.23 (-0.49–0.19) | 0       | -                  |

Median changes (Range) from baseline.

\* Exact Value. Nvoxel: number of enhancing voxels; IRE: Initial Rate of Enhancement; ME:

Maximum Enhancement; n: Number of patients that were included and fulfilled the predefined

imaging criteria; CZP: Certolizumab Pegol; PBO: Placebo; CI: confidence interval; PIP: proximal

interphalangeal joint; MCP: metacarpophalangeal joint.
